# Supplementary material
Source: publisher figshare collection journal article supplement (https://springernature.figshare.com/ndownloader/files/15257489)
Supplement: Supplementary file 1 [file 15257489]

Additional file 1

**Multiwalled carbon nanotubes decorated with bismuth (III) oxide for electrochemical detection of an antipyretic and analgesic drug, paracetamol in biological samples**

**Author 1, Author 2, Author 3, Author 4**

**Figure S1.** plot of log Ipa vs. log *v*.

**Figure S2.** plot of log E *vs*. log *v*.

**Figure S3**. Effect of storage time of B2O3/MWCNT/GCE on the current response to 10 μM paracetamol.

**Figure S4**. Oxidation signal change of 10 μM paracetamol in the presence of interferents.
